# Supplementary material for: Structure analysis of free and bound states of an RNA aptamer against ribosomal protein S8 from Bacillus anthracis
Source: PubMed Central journal article supplement (PMC4176348; doi:10.1093/nar/gku743), 2014-08-19
Supplement: supp_gku743_nar-01257-r-2014-File010.pdf [file supp_gku743_nar-01257-r-2014-File010.pdf]

## Supporting Information

### Structure Analysis of free and bound states of an RNA Aptamer Against Ribosomal Protein S8 from *Bacillus anthracis*<sup>†</sup>

Milya Davlieva<sup>1</sup>, James Donarski<sup>2</sup>, Jiachen Wang<sup>3</sup>, Yousif Shamoo<sup>1</sup> and Edward P.

Nikonowicz<sup>1,\*</sup>

<sup>1</sup>Department of Biochemistry and Cell Biology Rice University, Houston, TX 77251-1892

<sup>2</sup>Food and Environment Research Agency, Sand Hutton, York, YO41 1LZ, United Kingdom

<sup>3</sup>Department of Physics, East China Normal University, 200062 Shanghai, P. R. China

## Methods

*In vitro RNA selection.* The RNA aptamer selection experiment was performed as described (1-3) using the template 5'-TAATACGACTCACTATAGGGATCGAGGCTTCCT(N<sub>Y</sub>)CUUCGG(N<sub>X</sub>)GGGAAGCCTCCAAGCT-3' where the T7 promoter sequence is underlined. X and Y designate the number of randomized nucleotides (X=7, 8, 9 and Y=9, 8, 7) for a total of 16 randomized nucleotides. The primer for the reverse transcription reaction was 5'-GGGGACGAAGCTTGGAGGCTTCCC-3'. The template was purified via denaturing PAGE, electroeluted, and amplified via PCR. A 10 ml transcription reaction was performed using the template and T7 RNA polymerase (4) and the resulting RNA pool isolated via denaturing PAGE, electroeluted (Schleicher & Schuell), and precipitated from ethanol. The RNA was suspended in binding buffer (10 mM Tris-HCl, pH 7.5, 1 mM DTT, 50 mM KCl, and 20 mM MgCl<sub>2</sub>) and the RNA pool passed through a nitrocellulose filter (Millipore) to remove RNA molecules that bound the filter. The unbound RNA was precipitated from ethanol with tRNA carrier, reverse transcribed, the template amplified by PCR followed by transcription to generate the preselected

RNA pool. The preselected RNA pool was incubated with *B. anthracis* r-protein S8 (2.0  $\mu$ M) for 30 min at 4 °C and the mixture passed through a nitrocellulose filter and the filter washed with binding buffer. The S8-bound RNA was eluted from the filters using binding buffer with 0.8 M urea and 0.5 M NaCl, precipitated from ethanol, reverse transcribed into cDNA, and PCR amplified to complete the first round of SELEX. For the next 4 rounds of selection, the KCl concentration of the binding buffer was increased: 50, 100, 200, and 400 mM. For the next 4 rounds of selection, 400 mM KCl was used and the concentrations of S8 protein in the binding reactions were sequentially reduced by 5-fold. A tenth round of selection was repeated using the last, most stringent set of conditions. DNA from the final round was cloned into the pGEM-T plasmid (Promega) and after transformation, 50 independent clones were isolated and the plasmid inserts sequenced.

## References

1. Conrad, R.C., Giver, L., Tian, Y. and Ellington, A.D. (1996) In vitro selection of nucleic acid aptamers that bind proteins. *Methods in enzymology*, **267**, 336-367.
2. Kenan, D.J. and Keene, J.D. (1999) In vitro selection of aptamers from RNA libraries. *Methods in molecular biology (Clifton, N.J)*, **118**, 217-231.
3. Wilson, D.S. and Szostak, J.W. (1999) In vitro selection of functional nucleic acids. *Annual review of biochemistry*, **68**, 611-647.
4. Milligan, J.F., Groebe, D.R., Witherell, G.W. and Uhlenbeck, O.C. (1987) Oligoribonucleotide synthesis using T7 RNA Polymerase and Synthetic DNA Templates. *Nucleic Acids Research*, **15**, 8783-8789.

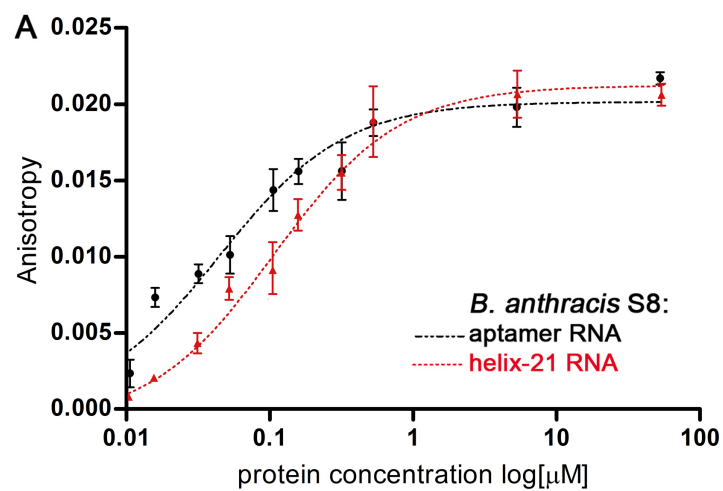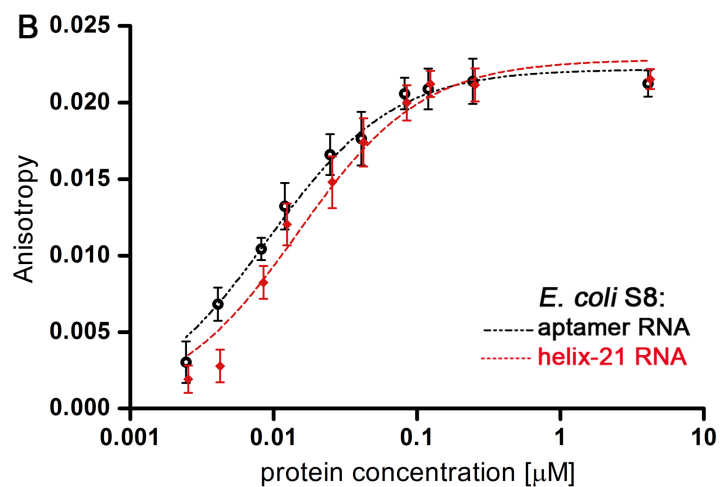

**Figure S1.** Plots of fluorescence polarization of fluorescein labeled RNA as a function of log r-protein S8 concentration. Samples were allowed to incubate at 4 °C for 5 minutes after mixing before fluorescence measurement. *B. anthracis* (A) and *E. coli* (B) r-protein S8 titrated with aptamer RNA (black) and helix-21 RNA (red).

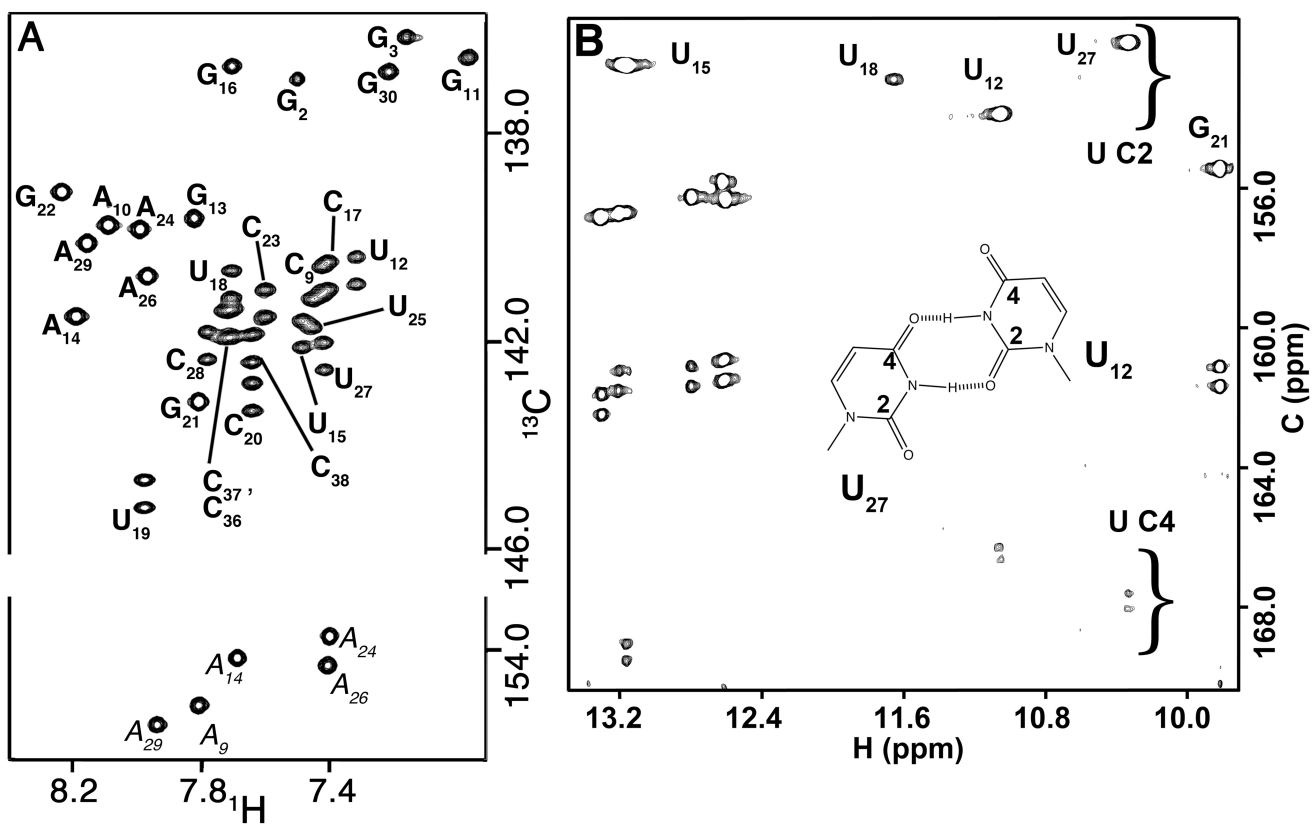

**Figure S2.** (A) Base region of 2D  $^1\text{H}$ - $^{13}\text{C}$  HSQC of RNA-1. (B) Imino H1/3-base carbon region of 2D H(N)CO spectrum of RNA-1 used to determine hydrogen bond scheme of the U<sub>12</sub>-U<sub>27</sub> base pair. The H(N)CO experiment was optimized to obtain intra-residue correlations. U<sub>12</sub> and U<sub>27</sub> imino resonances were assigned through C2 and C4 chemical shifts of the 2D H(CN)C spectrum. The hydrogen bond scheme was determined based on anomalous  $^{13}\text{C}$  chemical shift values and the internal A-U and tetraloop U C2 and C4 chemical shift values.

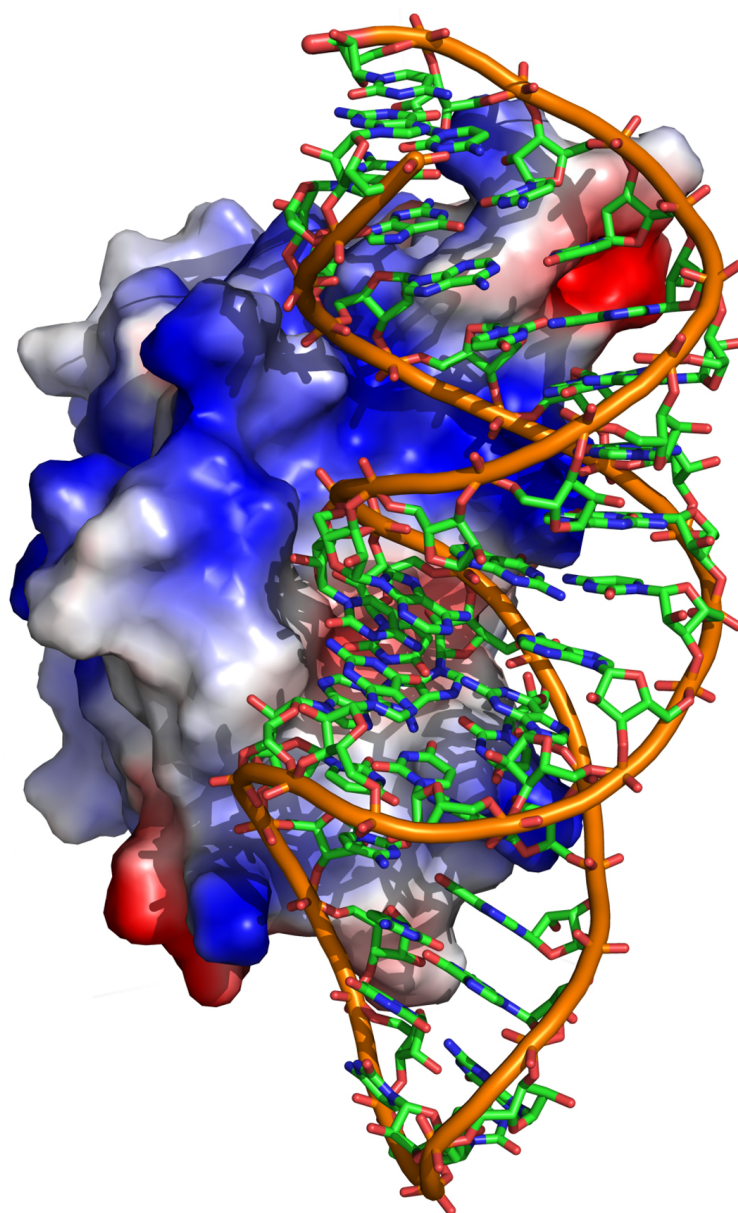

**Figure S3.** Rendering of the expected surface charge of S8 and the RNA aptamer. A large electropositive patch (blue) on the S8 surface complements the phosphate backbone of the aptamer formed by the Watson-Crick stem distal to the tetraloop. The intermolecular base and ribose hydrogen bonds and  $\pi$ -stacking interactions involving the non-canonical region of the RNA aptamer originate from a smaller electronegative patch (red) on the S8 protein.

**Table S1. NMR experimental constraint and refinement statistics for the RNA apatmer.**

| <b>Constraint</b>                           |               |       |
|---------------------------------------------|---------------|-------|
| <b>NOE distance constraints</b>             |               |       |
| total (including intra-ribose)              |               | 524   |
| <sup>a</sup> intra-residue                  |               | 152   |
| inter-residue                               |               | 148   |
| <sup>a</sup> mean number per residue        |               | 10.7  |
| <b>NOE constraints by category</b>          |               |       |
| very strong                                 | (0.0 - 3.0 Å) | 15    |
| strong                                      | (0.0 - 4.0 Å) | 66    |
| medium                                      | (0.0 - 5.0 Å) | 92    |
| weak                                        | (0.0 - 6.0 Å) | 90    |
| very weak                                   | (0.0 - 7.0 Å) | 37    |
| <b>base pair constraints</b>                |               |       |
| total                                       |               | 62    |
| <b>dihedral angle constraints</b>           |               |       |
| <sup>b</sup> ribose ring                    |               | 78    |
| backbone                                    |               | 115   |
| mean number per residue                     |               | 6.9   |
| <b>violations</b>                           |               |       |
| average distance constraints > 0.3Å         |               | 0.22  |
| average dihedral constraints > 0.5°         |               | 1.8   |
| <b><sup>c</sup>RMSD from ideal geometry</b> |               |       |
| bonds (Å)                                   |               | 0.003 |
| angles (°)                                  |               | 0.72  |

<sup>a</sup>Only conformationally restrictive constraints are included, intra-ribose constraints are not included.

<sup>b</sup>Three torsion angles within each ribose ring were used to constrain the ring to either the C2'-*endo* or C3'-*endo* conformation.

<sup>c</sup>Calculated for the minimized average structure.

**Table S2. Data collection and refinement statistics for S8-RNA complex.**

| <b>Data collection</b>                |                                                                           |
|---------------------------------------|---------------------------------------------------------------------------|
| Wavelength (Å)                        | 1.5418                                                                    |
| Resolution (Å) <sup>a</sup>           | 28.21-2.60 (2.69-2.60)                                                    |
| Space group                           | P212121                                                                   |
| Molecules per a.u.                    | 1                                                                         |
| Unit Cell (Å)                         | a = 55.41, b = 59.27, c = 92.25<br>$\alpha = \beta = \gamma = 90.0^\circ$ |
| Unique reflections <sup>a</sup>       | 9796 (958)                                                                |
| Average redundancy <sup>a</sup>       | 7.08 (6.73)                                                               |
| Completeness (%) <sup>a</sup>         | 98.9 (99.9)                                                               |
| R <sub>merge</sub> (%) <sup>a,b</sup> | 9.2 (64.3)                                                                |
| Output <I/sigI> <sup>a</sup>          | 11.0 (2.7)                                                                |
| <b>Refinement</b>                     |                                                                           |
| R <sub>work</sub> (%) <sup>c</sup>    | 18.9                                                                      |
| R <sub>free</sub> (%) <sup>d</sup>    | 27.0                                                                      |
| r.m.s.d. <sup>e</sup> from ideality   |                                                                           |
| Bonds (Å)                             | 0.009                                                                     |
| Angles (°)                            | 1.28                                                                      |
| Average B-factor (Å <sup>2</sup> )    | 49.9                                                                      |
| Ramachandran <sup>f</sup>             |                                                                           |
| favored (%)                           | 90.6                                                                      |
| disallowed (%)                        | 0.0                                                                       |

<sup>a</sup> Values for the last shell are in parenthesis

<sup>b</sup>  $R_{\text{merge}} = \sum |I - \langle I \rangle| / \sum I$ , where I is measured intensity for reflections with indices of hkl.

<sup>c</sup>  $R_{\text{work}} = \sum |F_o - F_c| / \sum |F_o|$  for all data with  $F_o > 2 \sigma(F_o)$  excluding data to calculate  $R_{\text{free}}$

<sup>d</sup>  $R_{\text{free}} = \sum |F_o - F_c| / \sum |F_o|$  for all data with  $F_o > 2 \sigma(F_o)$  excluded from refinement.

<sup>e</sup> Root mean square deviation

<sup>f</sup> Calculated by using MolProbity.

**Table S3. <sup>1</sup>H, <sup>13</sup>C, <sup>15</sup>N, <sup>31</sup>P Chemical shift assignments.**

| residue | H6/H8 | H2/H5 | H1'  | H2'  | H3'  | H4'  | H5'/5''    | NH    |
|---------|-------|-------|------|------|------|------|------------|-------|
| G1      | 8.05  |       | 5.81 | 4.87 | 4.56 | 4.36 | 4.02,3.90  |       |
| G2      | 7.50  |       | 5.89 | 4.78 | 4.47 | 4.52 | 4.42,4.17  | 12.78 |
| G3      | 7.16  |       | 5.72 | 4.48 | 4.44 | 4.43 | 4.44,4.05  | 13.17 |
| C9      | 7.43  | 5.14  | 5.40 | 4.37 | 4.48 | 4.34 | 4.49,4.04  |       |
| A10     | 8.09  | 7.82  | 5.99 | 4.64 | 4.60 | 4.44 | 4.45,4.13  |       |
| G11     | 6.96  |       | 5.39 | 4.53 | 4.52 | 4.39 | 4.24,3.96  | n.o.  |
| U12     | 7.36  | 5.07  | 5.38 | 4.06 | 4.39 | 4.23 | 4.27,4.00  | 11.08 |
| G13     | 7.82  |       | 5.56 | 4.66 | 4.71 | 4.48 | 4.20,4.09  | n.o.  |
| A14     | 8.19  | 7.69  | 5.78 | 4.77 | 4.58 | 4.50 | 4.35,4.23  |       |
| U15     | 7.49  | 5.10  | 5.31 | 4.49 | 4.42 | 4.35 | 4.40,4.15  | 13.15 |
| G16     | 7.70  |       | 5.79 | 4.44 | 4.28 | 4.41 | 4.30,4.12  | 12.60 |
| C17     | 7.38  | 5.15  | 5.39 | 4.45 | 4.19 | 4.36 | 4.43,3.98  |       |
| U18     | 7.72  | 5.66  | 5.59 | 3.75 | 4.49 | 4.31 | 4.44,4.04/ | 11.68 |
| U19     | 7.98  | 5.80  | 6.05 | 4.64 | 3.97 | 4.42 | 4.19,3.98  | n.o.  |
| C20     | 7.64  | 6.08  | 5.91 | 4.05 | 4.43 | 3.74 | 3.52,2.65  |       |
| G21     | 7.81  |       | 5.91 | 4.79 | 5.58 | 4.35 | 4.34,4.13  | 9.80  |
| G22     | 8.24  |       | 4.39 | 4.40 | 4.22 | 4.33 | 4.43,4.21  | 13.29 |
| C23     | 7.61  | 5.22  | 5.43 | 4.43 | 4.36 | 4.28 | 4.43,3.96  |       |
| A24     | 8.00  | 7.40  | 5.94 | 4.61 | 4.48 | 4.44 |            |       |
| U25     | 7.46  | 5.20  | 5.44 | 4.26 | 4.08 | 4.46 |            | n.o.  |
| A26     | 7.97  | 7.41  | 5.76 | 4.53 | 4.27 | 4.49 | 4.37,4.10  |       |
| U27     | 7.42  | 5.22  | 5.09 | 4.18 | 4.25 | 4.28 | 4.30,4.00  | 10.53 |
| C28     | 7.78  | 5.66  | 5.49 | 4.33 | 4.52 | 4.30 | 4.37,4.04  |       |
| A29     | 8.16  | 7.94  | 6.04 | 4.65 | 4.61 | 4.50 | 4.43,4.16  |       |
| G30     | 7.21  |       | 5.57 | 4.50 | 4.25 | 4.45 | 4.29,4.05  | 12.47 |
| C36     | 7.72  | 5.08  | 5.42 | 4.51 | 4.29 | 4.37 | 4.46,4.01  |       |
| C37     | 7.74  | 5.41  | 5.44 | 4.42 | 4.48 | 4.38 | 4.42,4.06  |       |
| C38     | 7.64  | 5.45  | 5.71 | 3.95 | 4.17 | 4.07 | 4.45,3.97  |       |

The non-exchangeable <sup>1</sup>H chemical shifts were measured at 26 °C and pH 6.6 and are referenced with DSS set to 0.00 ppm. Exchangeable proton chemical shifts were measured at 12 °C. The uncertainties in the chemical shift values are ≈0.02 ppm. The 5' and 5'' protons are not stereospecifically assigned.



| residue | C6/C8  | C2/C5  | C1'   | C2'   | C3'   | C4'   | C5'   | N(H)   |
|---------|--------|--------|-------|-------|-------|-------|-------|--------|
| G1      | 138.97 | -      | -     | 74.11 |       |       |       |        |
| G2      | 136.91 |        | 92.12 | 75.24 | 73.08 | 82.28 | 66.29 | 148.23 |
| G3      | 136.12 |        | 92.53 | 75.09 | 72.36 | 82.01 | 64.83 | 149.08 |
| C9      | 140.81 | 96.96  | 93.39 | 75.40 | 72.27 | 81.92 | 64.32 |        |
| A10     | 139.74 | 155.45 | 91.29 | 76.21 | 73.70 | 82.19 | 65.57 |        |
| G11     | 136.52 | 103.06 | 92.43 | 75.02 | 74.06 | 82.64 | 67.81 | n.o.   |
| U12     | 140.74 | 103.65 | 92.79 | 75.61 | 72.63 | 82.99 | 64.68 | 158.44 |
| G13     | 139.62 | 154.36 | 88.70 | 75.01 | 76.83 | 84.96 | 67.18 | n.o.   |
| A14     | 141.53 | 154.15 | 90.36 | 75.32 | 74.33 | 82.90 | 66.74 |        |
| U15     | 141.88 | 103.49 | 92.55 | 74.44 | 72.10 |       |       | 162.55 |
| G16     | 136.66 |        | 91.83 | 75.09 | 73.17 | 82.19 | 66.83 | 148.10 |
| C17     | 140.78 | 96.71  | 93.14 | 75.32 | 71.74 | 81.74 | 64.41 |        |
| U18     | 140.90 | 104.91 | 93.89 | 75.91 | 73.08 | 82.37 | 63.88 | 160.44 |
| U19     | 144.94 | 105.32 | 88.39 | 74.30 | 77.72 | 86.83 | 67.81 | n.o.   |
| C20     | 143.07 | 98.09  | 88.24 | 77.55 | 80.22 | 84.33 | 67.22 |        |
| G21     | 143.16 |        | 93.95 | 77.45 | 75.76 | 83.08 | 68.97 | 143.65 |
| G22     | 138.11 |        | 92.57 | 75.61 | 74.44 | 82.99 | 69.63 | 148.67 |
| C23     | 141.30 | 96.69  | 92.47 | 75.32 | 71.92 | 82.10 | 64.14 |        |
| A24     | 139.78 | 153.75 | 92.36 | 75.84 | 72.69 | n.a.  | n.a.  |        |
| U25     | 141.48 | 103.46 | 91.76 | 77.33 | 70.40 | n.a.  | n.a.  | n.o.   |
| A26     | 140.74 | 154.31 | 91.70 | 75.40 | 73.97 | 83.17 | 66.82 |        |
| U27     | 142.32 | 102.99 | 92.84 | 74.79 | 72.63 | 82.46 | 64.95 | 157.20 |
| C28     | 142.07 | 97.68  | 92.65 | 75.54 | 72.99 | 81.65 | 64.86 |        |
| A29     | 140.06 | 155.08 | 90.92 | 75.84 | 74.42 | 82.73 | 66.29 |        |
| G30     | 136.80 |        | 92.69 | 74.87 | 73.70 | 82.64 | 67.35 | 148.98 |
| C36     | 141.65 | 96.07  | 93.27 | 75.17 | 71.74 | 81.83 | 64.23 |        |
| C37     | 141.70 | 97.12  | 93.76 | 75.84 | 73.34 | 82.37 | 65.42 |        |
| C38     | 142.14 | 97.66  | 92.16 | 77.40 | 69.86 | 83.35 | 65.40 |        |

| residue | YN1/<br>RN9 | YC2/<br>GC2 | YC4/<br>GC6 | RN7    | A N1   | A N3   | A/C<br>N6/N4 | NH <sub>2</sub> | 5'-P  |
|---------|-------------|-------------|-------------|--------|--------|--------|--------------|-----------------|-------|
| G1      | -           | -           | -           | -      | -      | -      | -            |                 |       |
| G2      | 169.52      |             |             | 233.79 |        |        |              |                 | n.a.  |
| G3      | 168.78      |             |             | 234.08 |        |        |              |                 | n.a.  |
| C9      | 150.74      | 159.54      | 169.19      |        |        |        | 97.75        | 8.34,6.79       | n.a.  |
| A10     | 169.75      |             |             | 230.52 | 229.26 | 214.81 | 82.33        | 6.71            | n.a.  |
| G11     | 168.34      |             |             | 235.42 |        |        |              |                 | n.a.  |
| U12     | 145.07      | 154.73      | 167.31      |        |        |        |              |                 | n.a.  |
| G13     | 166.93      |             |             | 236.76 |        |        |              |                 | n.a.  |
| A14     | 168.93      |             |             | 230.75 | 223.17 | 214.46 | 82.12        | n.o.            | n.a.  |
| U15     |             | 153.30      | 169.58      |        |        |        |              |                 | n.a.  |
| G16     | 169.82      |             |             | 234.83 |        |        |              |                 | -4.02 |
| C17     | 151.61      | 159.42      | 169.24      |        |        |        | 99.29        | 8.44,6.79       | n.a.  |
| U18     | 147.12      | 153.78      | 168.48      |        |        |        |              |                 | -4.36 |
| U19     | 144.02      | 155.84      | 169.55      |        |        |        |              |                 | -3.51 |
| C20     | 150.77      | 160.81      | 168.74      |        |        |        | 93.63        | 7.06,6.20       | -5.05 |
| G21     | 171.75      | 156.38      | 162.35      | 231.71 |        |        |              |                 | -4.94 |
| G22     | 170.41      |             |             | 233.12 |        |        |              |                 | -2.40 |
| C23     | 152.02      | 159.56      | 169.27      |        |        |        | 97.49        | 8.55,6.75       | -4.36 |
| A24     | 170.93      |             |             | 231.19 | 222.20 | 213.82 | 83.56        | n.o.            | n.a.  |
| U25     | 146.55      | 153.70      | 168.97      |        |        |        |              |                 | -3.51 |
| A26     | 169.23      |             |             | 231.41 | 225.47 | 215.74 | 80.84        | 6.45            | -5.05 |
| U27     | 146.35      | 152.98      | 168.67      |        |        |        |              |                 | -4.94 |
| C28     | 151.68      | 159.74      | 168.94      |        |        |        | 98.16        | 8.01,7.04       | -2.40 |
| A29     | 169.08      |             |             | 231.04 | 229.70 | 213.90 | 81.71        | 6.76            | n.a.  |
| G30     | 168.34      |             |             | 233.56 |        |        |              |                 | n.a.  |
| C36     | 152.10      | 159.60      | 168.93      |        |        |        | 98.62        | 8.49,6.70       | n.a.  |
| C37     | 146.52      | 159.72      | 169.32      |        |        |        | 98.31        | 8.41,6.77       | n.a.  |
| C38     | 153.64      | 160.66      | 169.52      |        |        |        | 97.18        | 8.22,6.92       | -4.61 |

The <sup>13</sup>C, <sup>15</sup>N, and <sup>31</sup>P frequencies corresponding to 0.00 ppm were set according to the 0.00 ppm <sup>1</sup>H (DSS) frequency at 26 °C using the ratio  $\gamma_C/\gamma_H$ ,  $\gamma_P/\gamma_H$ , and  $\gamma_N/\gamma_H$ . The chemical shifts have uncertainties of  $\approx 0.05$  ppm and  $\approx 0.03$  ppm. Y = U or C; R = G or A.
